## Activation of Mouse and Human Peroxisome Proliferator-Activated Receptors (PPARs) by Phthalate Monoesters

Moses T. Bility,\* Jerry T. Thompson,\* Richard H. McKee,† Raymond M. David,‡ John H. Butala,§  
John P. Vanden Heuvel\* and Jeffrey M. Peters\*<sup>1</sup>

\*Department of Veterinary Science and The Center for Molecular Toxicology and Carcinogenesis, The Pennsylvania State University, University Park, Pennsylvania 16802; †ExxonMobil Biomedical Sciences Inc., Annandale, New Jersey 08801-0971; ‡Consultant to Eastman Chemical Company, Rochester, New York 14652-6272; and §Toxicology Consultants Inc., Gibsonia, Pennsylvania 15044

Received July 6, 2004; accepted August 5, 2004

Administration of phthalates is known to cause toxicity and liver cancer in rodents through the activation of peroxisome proliferator-activated receptors (PPARs), and the monoesters appear to be the active metabolites that function as ligands of PPARs. There is evidence that PPARs exhibit significant species differences in response to ligand activation. In this study, the activation of mouse and human PPAR $\alpha$ , PPAR $\beta$ , and PPAR $\gamma$  by a broad class of phthalate monoesters was investigated using a trans-activation assay, functional analysis of PPAR $\alpha$  target gene expression, and a PPAR $\gamma$ -mediated differentiation assay. These studies demonstrated a range in the ability of various phthalate monoesters to activate PPAR $\alpha$ , with the mouse PPAR $\alpha$  generally being activated at lower concentrations and exhibiting a greater response than human PPAR $\alpha$ . Similarly, a range in the trans-activation of mouse PPAR $\beta$  by phthalate monoesters was also observed, but this effect was not found with human PPAR $\beta$ . A number of phthalate monoesters activated both mouse and human PPAR $\gamma$ , with similar sensitivity being exhibited by both receptors. These studies show that the potency and efficacy of phthalate monoesters for the activation of PPAR $\alpha$  and PPAR $\gamma$  increase with increasing side-chain length. These studies also show that mouse PPAR $\alpha$  and PPAR $\beta$  are generally activated at lower concentrations of phthalate monoesters than human PPAR $\alpha$  and PPAR $\beta$ , and that both mouse and human PPAR $\gamma$  exhibit similar sensitivity to phthalate monoesters. Lastly, there is a good relationship between the relative ability of phthalate monoesters to trans-activate PPAR $\alpha$  and PPAR $\gamma$ , and the relative induction of PPAR $\alpha$  target gene mRNA and PPAR $\gamma$ -mediated adipocyte differentiation, respectively.

**Key Words:** peroxisome proliferator-activated receptors (PPARs); phthalate monoesters.

Phthalate diesters are chemicals that are widely used, primarily as plasticizers in the manufacture of flexible vinyl products including medical devices as well as in some nonvinyl products

including cosmetics (Blass, 1992). Phthalate diesters can leach from vinyl products and enter the surrounding environment. Recent examination of urinary levels of phthalate monoesters in a United States reference population indicated human exposure to several phthalate monoesters (Blount *et al.*, 2000; Kato *et al.*, 2004; Silva *et al.*, 2004). The phthalate monoesters with the highest urinary levels were monoethyl phthalate (MEP; 9,463 ppb), monobenzyl phthalate (MBenP; 464 ppb), and monobutyl phthalate (MButP; 306 ppb). Human exposure to phthalates is due primarily to ingestion of food contaminated from environmental sources (Kavlock *et al.*, 2002a,b,c), although inhalation of airborne or dust-associated phthalates may also occur (Adibi *et al.*, 2003). Dermal contact with products containing phthalates can also contribute to exposure, although high-molecular-weight phthalates are very poorly absorbed (Elsisi *et al.*, 1989). Once ingested or otherwise absorbed, phthalate diesters are hydrolyzed to the corresponding monoesters by esterases in the liver and blood and by pancreatic lipases in the gastrointestinal tract (Huber *et al.*, 1996).

Many of the adverse effects, including hepatocarcinogenesis, induced by monoesters of high-molecular-weight phthalates (e.g.,  $\geq C_6$  side-chains) in rodents are thought to be mediated by peroxisome proliferator-activated receptors (PPARs) (Doull *et al.*, 1999). PPARs are members of the nuclear receptor superfamily and consist of three isoforms, namely PPAR $\alpha$ , PPAR $\beta$ ( $\delta$ ), and PPAR $\gamma$  (Shearer and Hoekstra, 2003). In response to ligand activation, PPARs heterodimerize with retinoid-X-receptor- $\alpha$  (RXR $\alpha$ ), interact with co-activators and peroxisome proliferator-response elements (PPREs) found in the promoter region of target genes, and modulate expression of target genes (Shearer and Hoekstra, 2003). Specific ligands have been identified for all three PPARs. For example, a broad class of chemicals collectively referred to as peroxisome proliferators (e.g., the fibrate class of hypolipidemic drugs, endogenous and dietary fatty acids, herbicides and phthalate monoesters), can all bind to, or specifically activate, PPAR $\alpha$  (Berger and Moller, 2002). Each PPAR participates in regulating biological functions through modulation of specific target genes.

<sup>1</sup> To whom correspondence should be addressed at Department of Veterinary Science and The Center for Molecular Toxicology and Carcinogenesis, The Pennsylvania State University, University Park, PA 16802. Fax: (814) 863-1696. E-mail: jmp21@psu.edu.

PPAR $\alpha$  regulates target genes that modulate fatty acid degradation, PPAR $\gamma$  regulates target genes that modulate glucose homeostasis, and PPAR $\beta$  may regulate fatty acid metabolism in skeletal muscle (Berger and Moller, 2002; Fredenrich and Grimaldi, 2004; Wang *et al.*, 2003). There is also evidence that all three PPARs modulate carcinogenesis. PPAR $\alpha$  is required to mediate hepatocarcinogenesis induced by peroxisome proliferators in rodents, and activation of PPAR $\gamma$  has been shown to be anti-carcinogenic in a number of model systems, but the role of PPAR $\beta$  in carcinogenesis is unclear (Gupta *et al.*, 2004; Harman *et al.*, 2004; Michalik *et al.*, 2004; Stephen *et al.*, 2004).

Previous work by others has shown that several phthalate monoesters (MEHP, MBenP, MButP) activate PPAR $\alpha$  and PPAR $\gamma$ , and that lower concentrations are required for activation of mouse PPAR $\alpha$  than human PPAR $\alpha$  (Hurst and Waxman, 2003; Maloney and Waxman, 1999). The purpose of the present studies was three-fold: (1) to examine the ability of a broader class of phthalate monoesters and related substances of varying side-chain length and structures, to activate all three PPARs, (2) to determine if there is a species difference in receptor activation for this broader class of phthalate monoesters, and (3) to compare receptor activation observed in a trans-activation assay with PPAR-mediated biological changes, or PPAR-mediated alterations in target gene expression. It is important to point out that the broad class of monoesters examined for these studies represents the majority of commercially important phthalates.

## MATERIALS AND METHODS

**Chemicals.** Mono-ethyl phthalate (MEP), mono-benzyl phthalate (MBenP), mono-isoheptyl phthalate (MIHP), mono-isononyl phthalate (MINP), mono-2-ethylhexyl adipate (MEHA), mono-isoheptyl phthalate (MIHP2), mono-2-ethylhexyl phthalate (MEHP), mono-isodecyl phthalate (MIDP), and mono-n-octyl phthalate (MnOP) were synthesized by ChemSyn Laboratories (Lenexa, KS) and kindly provided by the Phthalate Esters Panel, American Chemistry Council. MButP was synthesized by Chem Service (West Chester, PA) and kindly provided by Dr. Kevin Gaido. Structures of the phthalate monoesters used for these studies are shown in Figure 1. Wy-14,643 (4-chloro-6-(2,3-xylidino)-2-pyrimidinethiol acetic acid) was purchased from ChemSyn Laboratories (Lenexa, KS). Troglitazone (Trog) was kindly provided by Dr. Takashi Yamoto (Sankyo, Shigouka, Japan). Dimethyl sulfoxide (DMSO) and tetradecylthioacetic acid (TTA) were purchased from Sigma Chemical Co. (St. Louis, MO).

**Plasmids.** The ligand-binding domain of mouse or human PPAR $\alpha$ , PPAR $\beta$ , or PPAR $\gamma$  was fused to the DNA-binding domain of the yeast transcription factor Gal4 under the control of the SV40 promoter. This plasmid also encoded the UAS-firefly luciferase reporter under the control of the Gal4 DNA response element.

**Cell culture and trans-activation assay.** Mouse 3T3-L1 fibroblasts (ATCC, Manassas, VA) were cultured in high-glucose Dulbecco's Minimal Essential Medium (DMEM) supplemented with 10% fetal bovine serum (FBS, Sigma, St Louis, MO), 0.2 mg/ml streptomycin and 200 U/ml penicillin (Gibco, Grand Island, NY). Cells were transfected with plasmid DNA using Lipofectamine reagent (Invitrogen, Carlsbad, CA) and following the manufacturer's recommended procedures, using 3T3-L1 cells at approximately 80% confluence in 10-cm culture dishes. After 6 h, the DNA-Lipofectamine complex

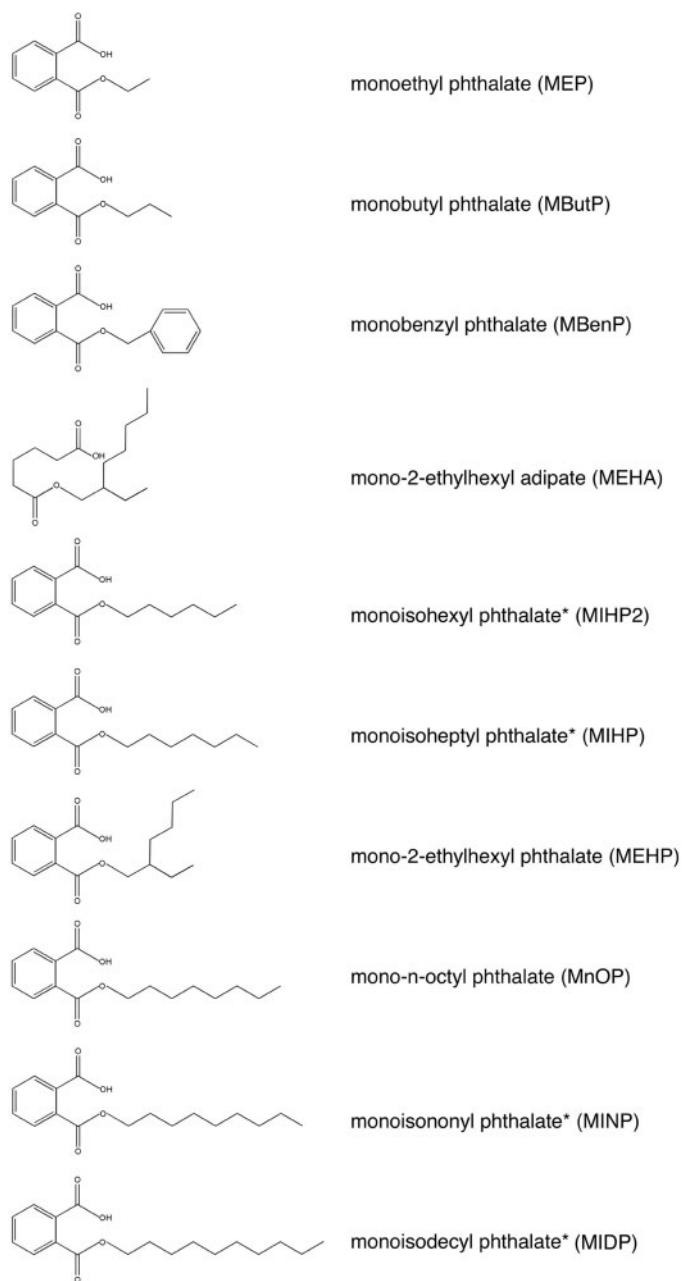

**FIG. 1.** Chemical structures of the phthalate monoesters tested for their ability to activate mouse and human PPARs. \*The alkyl side-chains of these monoesters are isomeric with methyl branching.

was removed, and the cells were maintained overnight in culture medium. Following overnight culture, the transfected 3T3-L1 cells containing chimeric mouse or human PPAR $\alpha$ -LBD/Gal4-DBD-(PPAR $\alpha$ -ligand binding domain/Gal4-DNA binding domain), PPAR $\beta$ -LBD/Gal4-DBD-, or PPAR $\gamma$ -LBD/Gal4-DBD-Gal4 luciferase reporter plasmids were split to multiwell cluster plates. The media was replaced, 4 h after replating, with serum-free DMEM containing phthalate monoesters at concentrations of 3, 10, 30, 100, or 200  $\mu$ M to evaluate PPAR activation. Solutions of phthalate monoesters and positive controls were prepared fresh on the day the cells were treated. Wy-14,643 (25  $\mu$ M) was used as a positive control for the activation of PPAR $\alpha$ , tetradecylthioacetic

acid (50  $\mu$ M) was used as a positive control for PPAR $\beta$  activation, and troglitazone (3  $\mu$ M) was used as a positive control for PPAR $\gamma$  activation. Twenty-four h after the treatment of the transfected 3T3-L1 cells with phthalate monoesters, the cells were lysed at  $-20^{\circ}\text{C}$  with passive lysis buffer (Promega, Madison, WI) for 30 min; luciferase activity was measured using the Luciferase reporter assay kit (Promega, Madison, WI) and a Turner TD-20/20 Luminometer (Turner BioSystems, Sunnyvale, CA) and manufacturer's recommended procedures. The protein concentration of the cell lysate was determined using the BCA protein assay kit (Pierce, Rockford, Illinois). Luciferase activity was normalized to the protein concentration of each sample. The fold induction of normalized luciferase activity was calculated relative to DMSO (vehicle)-treated cells, and represents the mean of three independent samples per treatment group.

**Cell culture and Northern blot analysis of PPAR $\alpha$ -dependent target mRNA induction in hepatoma cell lines.** Rat hepatoma FaO cells were cultured in DMEM supplemented with 5% FBS, 100 units/ml of penicillin, and 100  $\mu$ g/ml of streptomycin. Human hepatoma HepG2 cells were cultured in alpha Minimal Essential Medium ( $\alpha$ MEM) supplemented with 5% FBS, 100 units/ml of penicillin, and 100  $\mu$ g/ml of streptomycin. FaO and HepG2 cells were seeded in 6-well plates at  $7 \times 10^5$  cells/well and treated for 48 h with either phthalate monoesters, DMSO (vehicle), or Wy-14,643 (100  $\mu$ M). The test concentrations of phthalate monoesters were either 10 or 100  $\mu$ M and corresponded to the lower or upper ends of the respective dose response curves obtained from the transactivation studies for those phthalate monoesters with significant PPAR $\alpha$  activity. These concentrations were also used for phthalate monoesters that did not exhibit significant PPAR $\alpha$  activity for comparative purposes. After treatment with the indicated phthalate monoester, total RNA was isolated using TRIZOL reagent (Invitrogen, Carlsbad, CA) and following the manufacturers recommended procedures. Five micrograms of total RNA were electrophoresed on 0.22 M formaldehyde denaturing agarose gel, transferred to a nylon membrane, and fixed using UV cross-linking. Membranes were hybridized in ULTRAhyb hybridization buffer (Ambion, Austin, TX) with random primed  $^{32}\text{P}$ -labeled probes for known PPAR $\alpha$  target genes including acyl-CoA oxidase (ACOX) and cytochrome P450 4A (CYP4A) or GAPDH (loading control) generated from the respective cDNA using Ready-To-Go DNA Labeling Beads (Amersham Biosciences, Piscataway, NJ) and following manufacturer's recommended procedures. Hybridization signals were obtained after scanning with a phosphor-imager and were normalized relative to GAPDH. The fold induction of normalized ACOX and CYP4A mRNAs in both FaO and HepG2 cells were calculated relative to DMSO (vehicle)-treated cells and represent the mean of two independent samples per treatment group.

**Cell culture and 3T3-L1 cell differentiation assay.** Mouse 3T3-L1 fibroblasts were cultured in DMEM containing 10% FBS at  $37^{\circ}\text{C}/5\% \text{CO}_2$ . The fibroblasts were later trypsinized and seeded at approximately 50% confluence in 12-well plates. Adipogenesis was induced 48 h postconfluence, using a standard differentiation assay (Green and Meuth, 1974). This consists of changing the culture medium to DMEM/4% FBS containing 1.0  $\mu$ g/ml insulin, 1  $\mu$ M dexamethasone, 100  $\mu$ M isomethylbutylxanthine, and troglitazone (10  $\mu$ M) or the indicated phthalate monoester and monitoring subsequent lipid accumulation. Four phthalate monoesters that had significant PPAR $\gamma$  activity based on the transactivation studies were used, and two phthalate monoesters that had no significant PPAR $\gamma$  activity were used for comparison. The media was replaced with DMEM/4% FBS containing 1.0  $\mu$ g/ml insulin and troglitazone (10  $\mu$ M), or the indicated phthalate monoester, every 48 h after the initiation of differentiation. The 3T3-L1 cells were fixed with formalin and stained with Oil Red O (Sigma Chemical Co, St. Louis, MO) 6 days after initiation of adipocyte differentiation. Briefly, cells were washed twice with phosphate buffered saline (PBS) and then fixed with formalin for 1 h at room temperature. The fixed cells were stained with Oil Red O (0.3%) for 1 h. Cells were washed three times with water, visualized with a Nikon Eclipse microscope, and photographed.

**Statistical analysis.** Differences between treatments were determined using ANOVA followed by Dunnett's post hoc test (Prism 4.0, GraphPad Software, Inc., San Diego, CA). Significant differences were determined when  $p \leq 0.05$ .

## RESULTS

### Activation of Mouse and Human PPAR $\alpha$ , PPAR $\beta$ , and PPAR $\gamma$ by Phthalate Monoesters

Phthalate monoesters of varying side-chain length and different structures were investigated for their ability to activate mouse and human PPARs. MEP, a C2 alkyl side-chain phthalate monoester (Fig. 1), did not consistently activate either mouse or human PPAR $\alpha$  (Fig. 2). MButP, a C3 alkyl side-chain phthalate monoester (Fig. 1), activated mouse PPAR $\alpha$  at a concentration  $\geq 100$   $\mu$ M, and human PPAR $\alpha$  at a concentration of 200  $\mu$ M (Fig. 2). MBenP, which has a benzyl side-chain (Fig. 1), caused increased luciferase activity with concentrations  $\geq 100$   $\mu$ M for mouse PPAR $\alpha$  and with a concentration of 200  $\mu$ M for human PPAR $\alpha$  (Fig. 2). MEHA, an adipic acid monoester of di-2-ethylhexyl adipate (DEHA; Fig. 1), caused increased luciferase activity with concentrations  $\geq 100$   $\mu$ M for mouse PPAR $\alpha$  (Fig. 2). However, while a significant increase in luciferase activity was observed with a concentration of 100  $\mu$ M MEHA with human PPAR $\alpha$ , no difference in activity was observed with 200  $\mu$ M MEHA for human PPAR $\alpha$  (Fig. 2). MIHP2, a branched C6 (isohexyl) alcohol side-chain phthalate monoester (Fig. 1), caused a dose-dependent increase in luciferase activity with concentrations of  $\geq 30$   $\mu$ M for mouse PPAR $\alpha$ , in contrast to human PPAR $\alpha$ , where an increase in luciferase activity was only observed with a concentration of 200  $\mu$ M (Fig. 2). MEHP, the active metabolite of the plasticizer di-2-ethylhexyl phthalate (DEHP), and MIHP, a branched C7 (isoheptyl) alcohol side-chain phthalate monoester (Fig. 1), caused a dose-dependent increase in luciferase activity with concentrations of  $\geq 10$   $\mu$ M for mouse PPAR $\alpha$ , and  $\geq 30$   $\mu$ M for human PPAR $\alpha$  (Fig. 2). A dose-dependent increase in luciferase activity was observed for MnOP, a linear C8 alkyl side-chain phthalate monoester (Fig. 1), with concentrations of  $\geq 10$   $\mu$ M for both mouse and human PPAR $\alpha$  (Fig. 1). MINP, a branched C9 (isononyl) alcohol side-chain phthalate monoester (Fig. 1), caused a dose-dependent increase in luciferase activity with concentrations of  $\geq 3$   $\mu$ M for mouse PPAR $\alpha$ , while a dose-dependent increase in luciferase activity was only observed at concentrations  $\geq 10$   $\mu$ M for human PPAR $\alpha$  (Fig. 2). MIDP, a branched C10 (isodecyl) alcohol side-chain phthalate monoester (Fig. 1), caused a dose-dependent increase in luciferase activity with concentrations of  $\geq 3$   $\mu$ M for mouse PPAR $\alpha$  (Fig. 1), while a concentration of  $\geq 30$   $\mu$ M was required to elicit a dose response for human PPAR $\alpha$  (Fig. 2). In general, lower concentrations of phthalate monoesters were required to activate mouse PPAR $\alpha$  as compared to human PPAR $\alpha$ , and the magnitude of the response was significantly greater for mouse PPAR $\alpha$  than for human PPAR $\alpha$  (Table 1).

Phthalate monoesters did not activate human PPAR $\beta$ , although mouse PPAR $\beta$  was responsive to some of these chemicals. Similar to results observed for PPAR $\alpha$ , MEP was ineffective at activating mouse PPAR $\beta$ -dependent luciferase



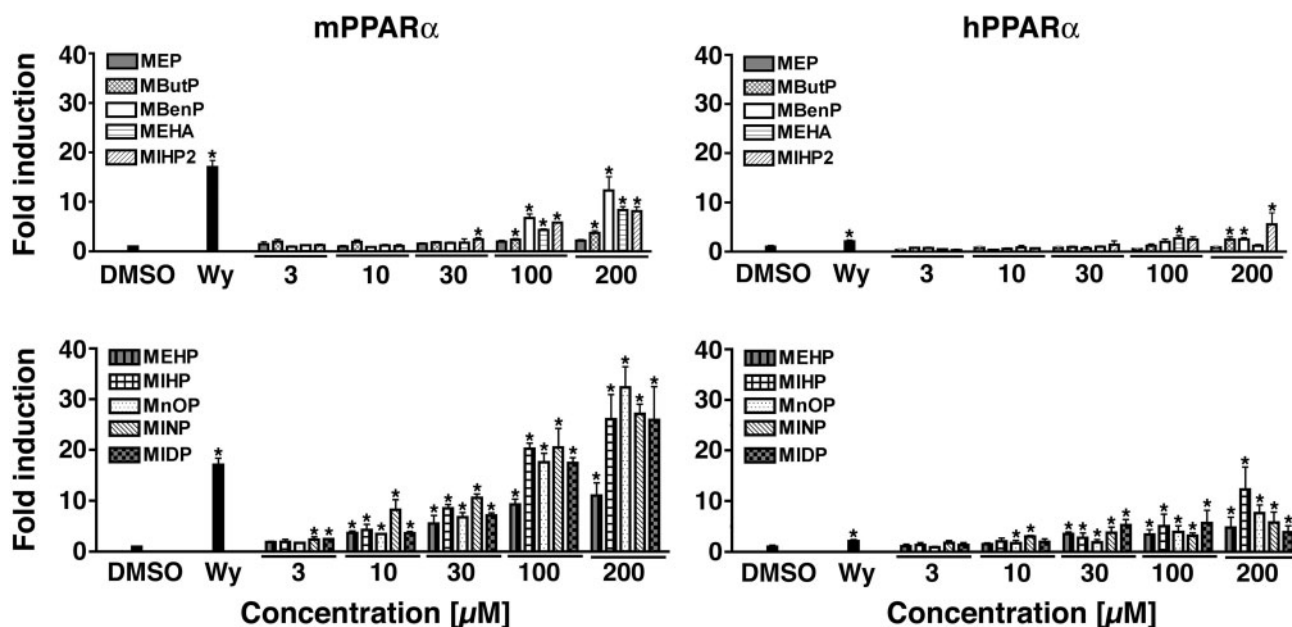

**FIG. 2.** Activation of mouse PPAR $\alpha$  (mPPAR $\alpha$ ), and human PPAR $\alpha$  (hPPAR $\alpha$ ) by phthalate monoesters. Transfected 3T3-L1 cells containing either the mouse or human PPAR $\alpha$ -LBD/Gal4-DBD-Gal4-luciferase reporter plasmid were treated with the indicated phthalate monoester at a concentration of either 3, 10, 30, 100, or 200  $\mu$ M for 24 h. Wy-14,643 (Wy) at a concentration of 25  $\mu$ M was used as a positive control. All luciferase activity values were normalized to the amount of protein in each cell lysate. The fold induction of normalized luciferase activity was calculated relative to DMSO (vehicle)-treated cells and represents the mean of three independent samples per treatment group; *p*-values were calculated using ANOVA followed by Dunnett's post hoc. Significant differences determined when *p*  $\leq$  0.05.

**TABLE 1**

**Comparative Summary of Phthalate Monoester Activation of mouse and Human PPAR $\alpha$**

| Monoester | Mouse PPAR $\alpha$                          |                                     | Human PPAR $\alpha$             |                        |
|-----------|----------------------------------------------|-------------------------------------|---------------------------------|------------------------|
|           | Lowest activation concentration <sup>a</sup> | Maximal fold-induction <sup>b</sup> | Lowest activation concentration | Maximal fold-induction |
| MEP       | —                                            | —                                   | —                               | —                      |
| MButP     | 100 $\mu$ M                                  | 3.7 $\pm$ 0.5                       | 200 $\mu$ M                     | 2.4 $\pm$ 0.6          |
| MBenP     | 100 $\mu$ M                                  | 12.3 $\pm$ 2.8                      | 200 $\mu$ M                     | 2.5 $\pm$ 0.4          |
| MEHA      | 100 $\mu$ M                                  | 8.3 $\pm$ 0.7                       | 100 $\mu$ M                     | 2.7 $\pm$ 0.6          |
| MIHP2     | 30 $\mu$ M                                   | 8.2 $\pm$ 0.8                       | 200 $\mu$ M                     | 5.6 $\pm$ 2.3          |
| MEHP      | 10 $\mu$ M                                   | 11.1 $\pm$ 2.4                      | 30 $\mu$ M                      | 4.8 $\pm$ 2.1          |
| MIHP      | 10 $\mu$ M                                   | 26.1 $\pm$ 4.8                      | 30 $\mu$ M                      | 12.3 $\pm$ 4.4         |
| MnOP      | 10 $\mu$ M                                   | 32.4 $\pm$ 4.0                      | 10 $\mu$ M                      | 7.6 $\pm$ 1.6          |
| MINP      | 3 $\mu$ M                                    | 27.1 $\pm$ 1.9                      | 10 $\mu$ M                      | 5.8 $\pm$ 2.1          |
| MIDP      | 3 $\mu$ M                                    | 26.9 $\pm$ 6.6                      | 30 $\mu$ M                      | 3.9 $\pm$ 1.2          |

<sup>a</sup>The lowest phthalate monoester concentration where a statistically significant increase in reporter activity was observed.

<sup>b</sup>The maximal fold-induction observed with this phthalate monoester.

activity (Fig. 3). While a concentration of 3  $\mu$ M MButP caused an increase in mouse PPAR $\beta$ -dependent luciferase activity, a dose-dependent increase in activity was only observed between 100 and 200  $\mu$ M (Fig. 3). Concentrations  $\geq$  100  $\mu$ M of MBenP and MEHA were required to cause a dose-dependent increase in

luciferase activity with the mouse PPAR $\beta$  construct, and concentrations  $\geq$  30  $\mu$ M MIHP2 caused a similar dose-dependent increase in activity (Fig. 3). MEHP and MIHP caused increases in luciferase activity with mouse PPAR $\beta$ , but only at a concentration of 200  $\mu$ M (Fig. 3). MnOP and MIDP caused dose-dependent increases in mouse PPAR $\beta$ -dependent luciferase activity at a concentration  $\geq$  100  $\mu$ M, while MINP was did not activate this PPAR isoform (Fig. 3). A comparative summary of these results is presented in Table 2.

No change in mouse PPAR $\gamma$ -dependent luciferase activity was observed for MEP, and although increased luciferase activity was observed using 10  $\mu$ M MEP for human PPAR $\gamma$ -transfected cells, no dose response was found (Fig. 4). MButP did not cause any changes in luciferase activity using either mouse or human PPAR $\gamma$  (Fig. 4). MBenP caused a dose-dependent increase in luciferase activity at a concentration  $\geq$  100  $\mu$ M for mouse PPAR $\gamma$ , while increased activity was only observed at a concentration of 200  $\mu$ M for the human PPAR $\gamma$  (Fig. 4). Whereas concentrations  $\geq$  30  $\mu$ M MEHA effectively increase luciferase activity using the mouse PPAR $\gamma$  construct, no significant increases in activity were observed with MEHA using the human PPAR $\gamma$  construct (Fig. 4). Increased luciferase activity caused by MIHP2 was only observed at a concentration of 200  $\mu$ M with mouse PPAR $\gamma$ , and no change in activity was found when human PPAR $\gamma$  was used (Fig. 4). Increased luciferase activity was found using concentrations of MEHP

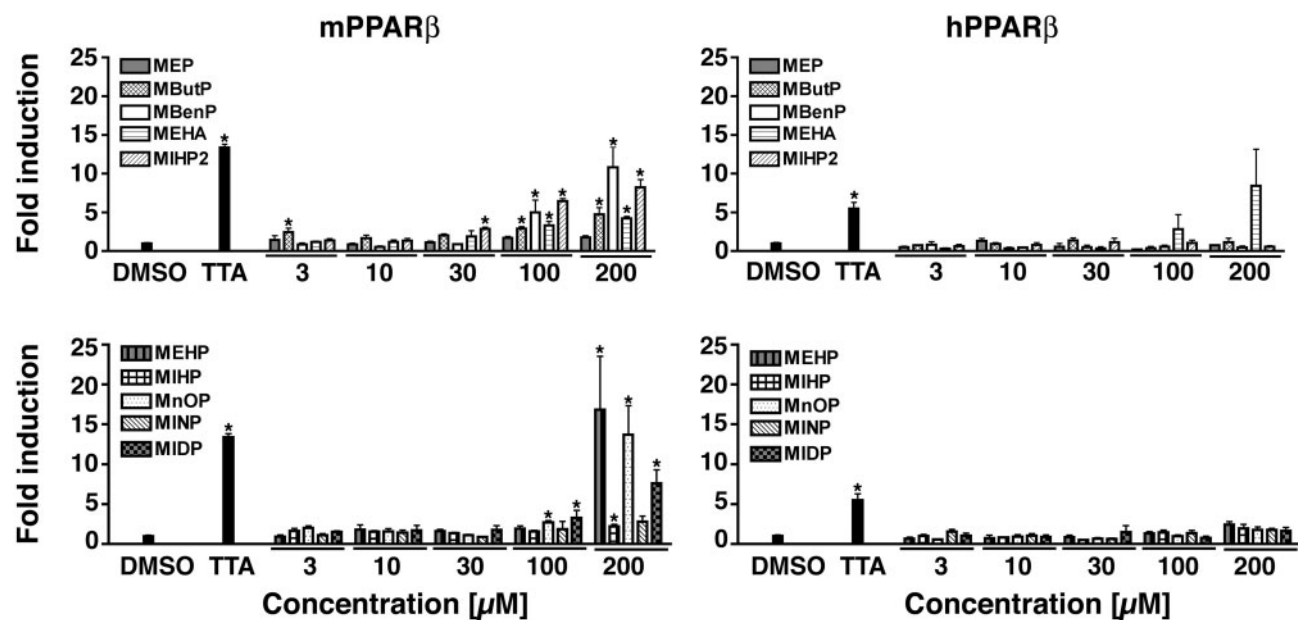

**FIG. 3.** Activation of mouse PPAR $\beta$  (mPPAR $\beta$ ), and human PPAR $\beta$  (hPPAR $\beta$ ) by phthalate monoesters. Transfected 3T3-L1 cells containing either the mouse or human PPAR $\beta$ -LBD/Gal4-DBD-Gal4-luciferase reporter plasmid were treated with the indicated phthalate monoester at a concentration of either 3, 10, 30, 100, or 200  $\mu$ M for 24 h. Tetradecylthioacetic acid (TTA) at a concentration of 50  $\mu$ M was used as a positive control. All luciferase activity values were normalized to the amount of protein in each cell lysate. The fold induction of normalized luciferase activity was calculated relative to DMSO (vehicle)-treated cells, and represents the mean of three independent samples per treatment group; *p*-values were calculated using ANOVA followed by Dunnett's post hoc. Significant differences determined when *p*  $\leq$  0.05.

**TABLE 2**

**Comparative Summary of Phthalate Monoester Activation of Mouse and Human PPAR $\beta$**

| Monoester | Mouse PPAR $\beta$                           |                                     | Human PPAR $\beta$              |                        |
|-----------|----------------------------------------------|-------------------------------------|---------------------------------|------------------------|
|           | Lowest activation concentration <sup>a</sup> | Maximal fold-induction <sup>b</sup> | Lowest activation concentration | Maximal fold-induction |
| MEP       | —                                            | —                                   | —                               | —                      |
| MButP     | 3 $\mu$ M                                    | 4.7 $\pm$ 0.9                       | —                               | —                      |
| MBenP     | 100 $\mu$ M                                  | 10.8 $\pm$ 2.7                      | —                               | —                      |
| MEHA      | 100 $\mu$ M                                  | 4.2 $\pm$ 0.3                       | —                               | —                      |
| MIHP2     | 30 $\mu$ M                                   | 8.3 $\pm$ 1.0                       | —                               | —                      |
| MEHP      | 200 $\mu$ M                                  | 16.8 $\pm$ 6.7                      | —                               | —                      |
| MIHP      | 200 $\mu$ M                                  | 2.2 $\pm$ 0.3                       | —                               | —                      |
| MnOP      | 100 $\mu$ M                                  | 13.7 $\pm$ 3.3                      | —                               | —                      |
| MINP      | —                                            | 2.8 $\pm$ 0.7                       | —                               | —                      |
| MIDP      | 100 $\mu$ M                                  | 7.6 $\pm$ 0.7                       | —                               | —                      |

<sup>a</sup>The lowest phthalate monoester concentration where a statistically significant increase in reporter activity was observed.

<sup>b</sup>The maximal fold-induction observed with this phthalate monoester.

$\geq$ 30  $\mu$ M with mouse PPAR $\gamma$ , while concentrations  $\geq$ 10  $\mu$ M resulted in a dose-dependent increase in luciferase activity with human PPAR $\gamma$  (Fig. 4). Concentrations  $\geq$ 100  $\mu$ M MIHP were required to cause increased luciferase activity for both the mouse and human PPAR $\gamma$  (Fig. 4). MnOP caused a dose-dependent

increase in luciferase activity at concentrations  $\geq$ 10  $\mu$ M and 100  $\mu$ M for mouse and human PPAR $\gamma$ , respectively (Fig. 4). MINP and MIDP both caused a dose-dependent increase in mouse and human PPAR $\gamma$ -dependent luciferase activity at concentrations of  $\geq$ 3 and 30  $\mu$ M, respectively (Fig. 4). In general, comparable (yet moderately variable) concentrations of phthalate monoesters were required to effectively activate both mouse and human PPAR $\gamma$ , and the magnitude of the response was essentially similar between both the mouse and human PPAR $\gamma$  (Table 3).

*Induction of PPAR $\alpha$ -Dependent Target Gene mRNA in Rat Hepatoma FaO Cells and Human Hepatoma HepG2 Cells*

The induction of mRNA encoding two PPAR $\alpha$  target genes, acyl CoA oxidase (ACOX) and cytochrome P450 4A (CYP4A) was measured by Northern blot analysis, using RNA from rodent liver FaO cells and human liver HepG2 cells following treatment with phthalate monoesters, at concentrations ranging from the low and high end of the dose-response curves generated from trans-activation studies. Consistent with the results of the trans-activation studies, longer side-chain phthalate monoesters were more potent in inducing ACOX and CYP4A mRNAs than shorter side-chain phthalate monoesters in the rodent liver FaO cells (Fig. 5A). Human liver HepG2 cells were nonresponsive to

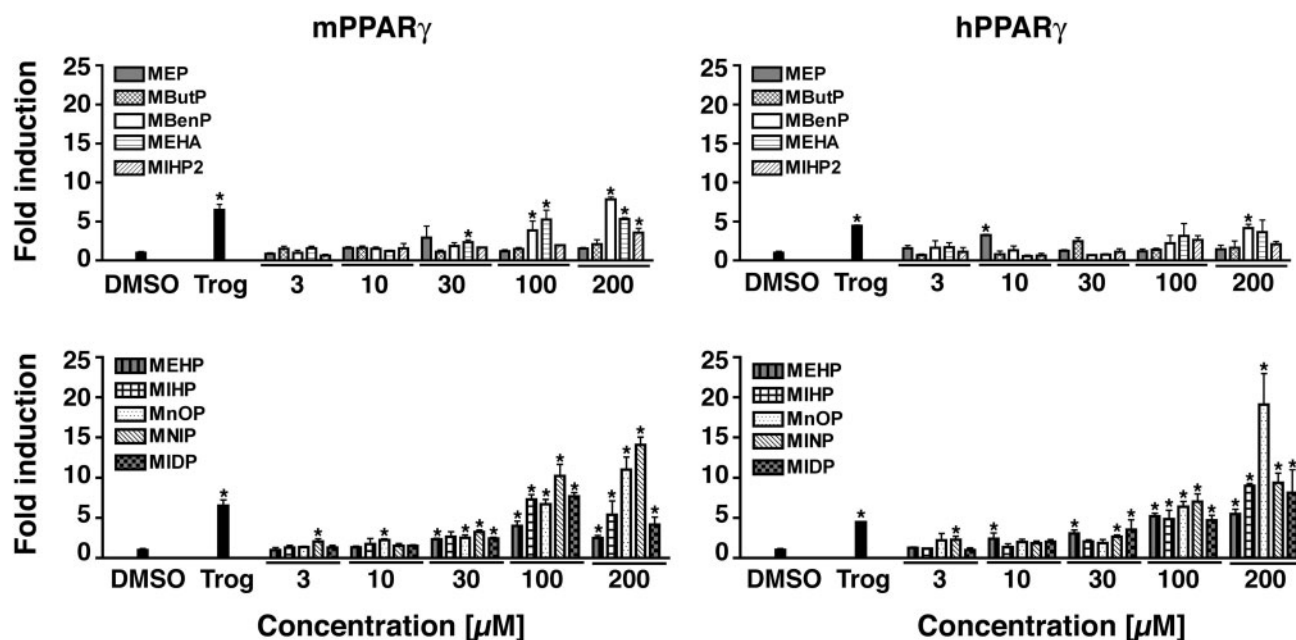

**FIG. 4.** Activation of mouse PPAR $\gamma$  (mPPAR $\gamma$ ) and human PPAR $\gamma$  (hPPAR $\gamma$ ) by phthalate monoesters. Transfected 3T3-L1 cells containing either the mouse or human PPAR $\gamma$ -LBD/Gal4-DBD-Gal4-luciferase reporter plasmid were treated with the indicated phthalate monoester at a concentration of either 3, 10, 30, 100, or 200  $\mu$ M for 24 h. Troglitazone (Trog) at a concentration of 3  $\mu$ M was used as a positive control. All luciferase activity values were normalized to the amount of protein in each cell lysate. The fold induction of normalized luciferase activity was calculated relative to DMSO (vehicle)-treated cells, and represents the mean of three independent samples per treatment group;  $p$ -values were calculated using ANOVA followed by Dunnett's post hoc. Significant differences determined when  $p \leq 0.05$ .

**TABLE 3**  
**Comparative Summary of Phthalate Monoester Activation of Mouse and Human PPAR $\gamma$**

| Monoester | Mouse PPAR $\gamma$                          |                                     | Human PPAR $\gamma$             |                        |
|-----------|----------------------------------------------|-------------------------------------|---------------------------------|------------------------|
|           | Lowest activation concentration <sup>a</sup> | Maximal fold-induction <sup>b</sup> | Lowest activation concentration | Maximal fold-induction |
| MEP       | —                                            | —                                   | 10 $\mu$ M*                     | 3.3 $\pm$ 0.1          |
| MButP     | —                                            | —                                   | —                               | —                      |
| MBenP     | 100 $\mu$ M                                  | 7.8 $\pm$ 0.4                       | 200 $\mu$ M                     | 4.2 $\pm$ 0.5          |
| MEHA      | 30 $\mu$ M                                   | 5.3 $\pm$ 0.2                       | —                               | —                      |
| MIHP2     | 200 $\mu$ M                                  | 3.6 $\pm$ 0.5                       | —                               | —                      |
| MEHP      | 30 $\mu$ M                                   | 2.5 $\pm$ 0.3                       | 10 $\mu$ M                      | 5.5 $\pm$ 0.6          |
| MIHP      | 100 $\mu$ M                                  | 5.4 $\pm$ 1.7                       | 100 $\mu$ M                     | 6.7 $\pm$ 1.0          |
| MnOP      | 10 $\mu$ M                                   | 11.0 $\pm$ 1.6                      | 100 $\mu$ M                     | 19.1 $\pm$ 3.9         |
| MINP      | 3 $\mu$ M                                    | 14.1 $\pm$ 1.0                      | 30 $\mu$ M                      | 9.3 $\pm$ 1.2          |
| MIDP      | 30 $\mu$ M                                   | 4.2 $\pm$ 0.9                       | 3 $\mu$ M                       | 8.1 $\pm$ 2.8          |

<sup>a</sup>The lowest phthalate monoester concentration where a statistically significant increase in reporter activity was observed.

<sup>b</sup>The maximal fold-induction observed with this phthalate monoester.

\*No further increase in reporter activity was observed at higher concentrations.

activation by phthalate monoesters for the induction of ACOX and CYP4A mRNA (Fig. 5B). These results are consistent with the species difference exhibited by mouse and human PPAR $\alpha$  in the trans-activation studies, where the magnitude of the response

to phthalate monoesters was greater for mouse PPAR $\alpha$  than human PPAR $\alpha$ .

#### Induction of PPAR $\gamma$ -Dependent Adipogenesis by Phthalate Monoesters

3T3-L1 fibroblasts terminally differentiate into adipocytes in a PPAR $\gamma$ -dependent manner when treated with PPAR $\gamma$  agonists in the presence of a differentiation cocktail consisting of dexamethasone, isobutylmethylxanthine, and insulin (Brun *et al.*, 1996). Lipid accumulation, indicative of PPAR $\gamma$ -dependent adipogenesis, was measured using Oil Red O staining. Consistent with the results of the trans-activation studies for the activation of PPAR $\gamma$ , the longer side-chain phthalate monoesters were more potent in inducing adipogenesis than the shorter side-chain phthalate monoesters (Fig. 6). Strong induction of adipogenesis was seen with MEHP, MINP, MIDP, and MnOP at 50  $\mu$ M, while no induction of adipogenesis was seen with MButP and MBenP at 50  $\mu$ M (Fig. 6).

#### DISCUSSION

This study was undertaken to characterize the hierarchy of potency for the activation of PPARs by a broad class of phthalate monoesters and the species differences between mouse and human PPARs for activation by this broad class of phthalate

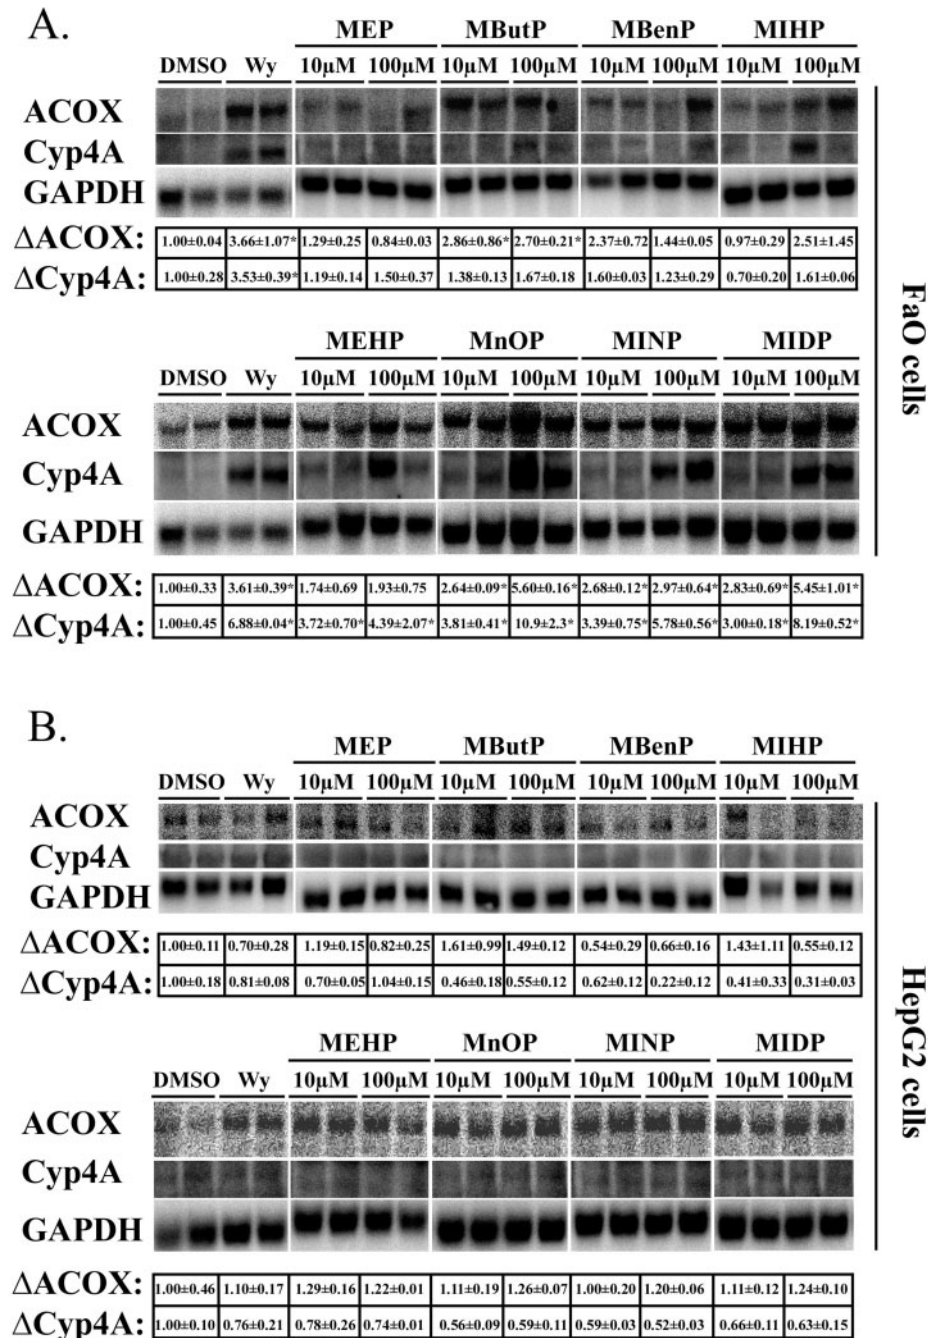

**FIG. 5.** Induction of PPARα target gene mRNAs acyl CoA oxidase (ACOX) and cytochrome P450 4A (CYP4A) in rodent FaO and human HepG2 liver cell lines. (A) Induction of PPARα target genes in rodent FaO cells treated with short and long side-chain phthalate monoesters. Note significant induction by longer side-chain phthalate monoesters in rodent FaO cells. (B) Induction of PPARα target genes in human HepG2 cells treated with short and long side-chain phthalate monoesters. Note the lack of induction by short and long side-chain phthalate monoesters in human HepG2 cells. The fold induction of normalized mRNA expression was calculated relative to DMSO (vehicle)-treated cells, and represents the mean of two independent samples per treatment group; *p*-values were calculated using ANOVA followed by Dunnett's post hoc. Significant differences determined when *p* ≤ 0.05.

monoesters. These studies utilized expression vectors containing both the PPAR-LBD/Gal4-DBD coding sequence, and the Gal4-luciferase reporter in the same plasmid. This one-hybrid model is a sensitive method to detect PPAR activation, because the chimeric receptor does not require heterodimerization with RXRα and is independent of other variables that could influence reporter activity. In contrast, transfections that use multiple expression vectors (e.g., PPARs, PPARE-reporter, etc) introduce



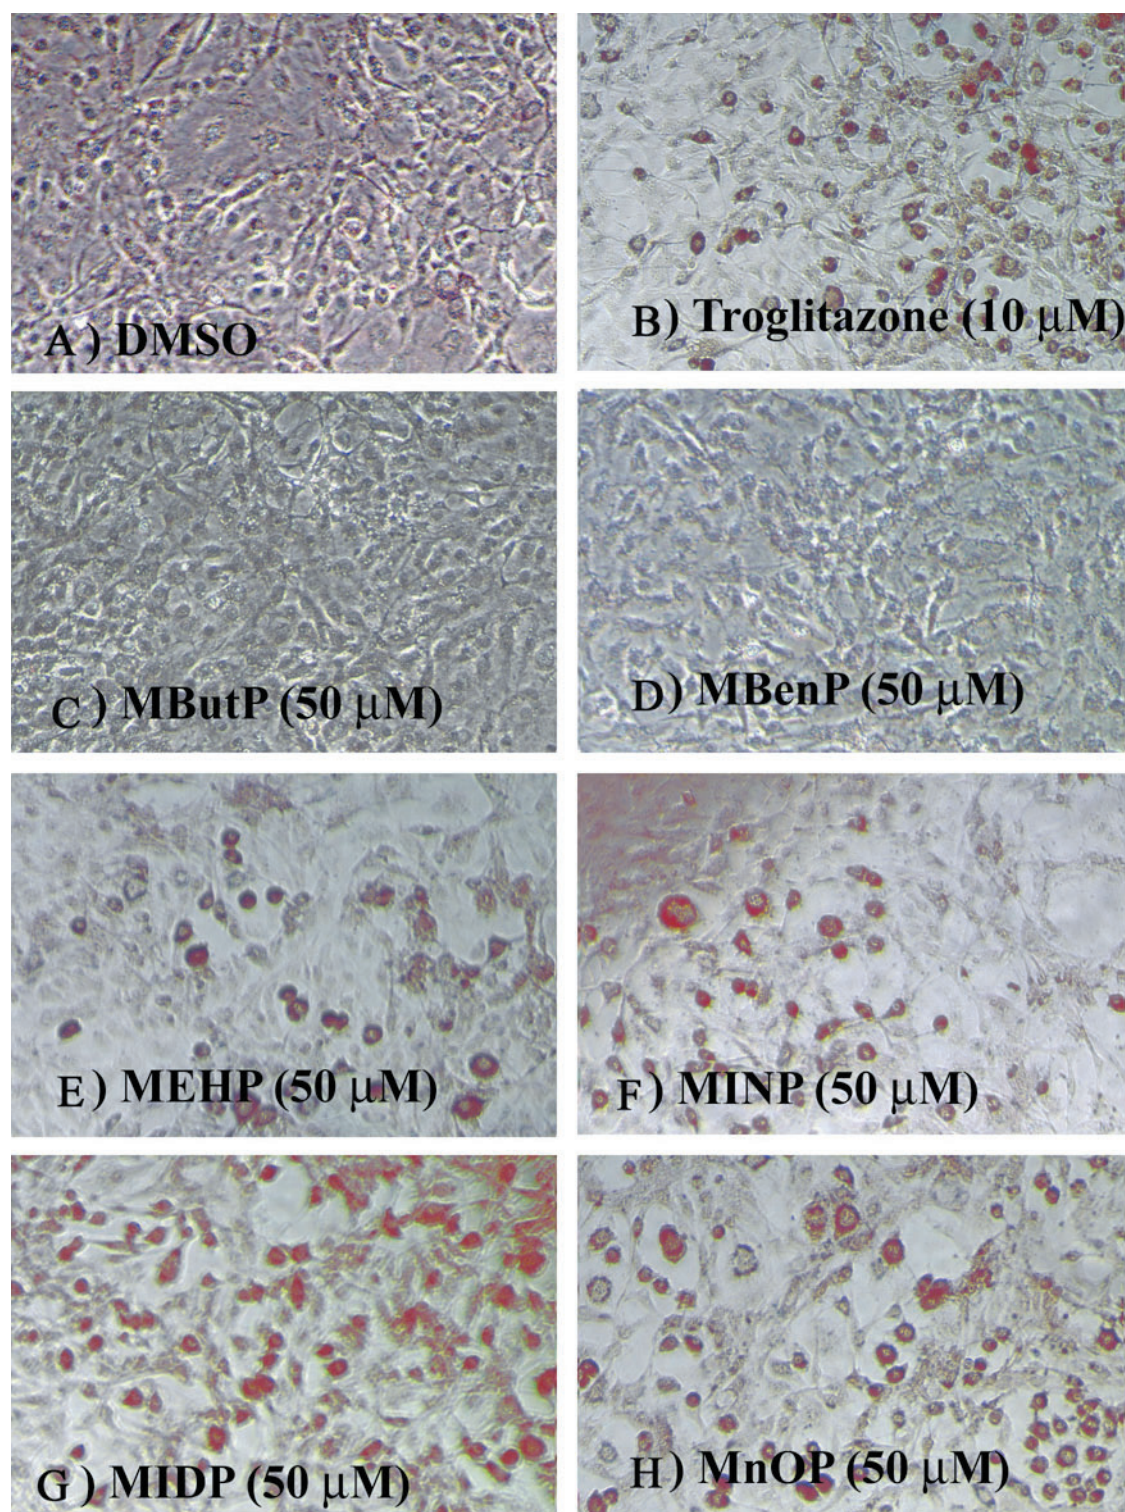

**FIG. 6.** Induction of PPAR $\gamma$ -dependent adipogenesis by phthalate monoesters in 3T3-L1 fibroblasts. 3T3-L1 fibroblasts were cultured with DMEM/4% FBS containing 1.0  $\mu$ g/ml insulin, 1  $\mu$ M dexamethasone and 100  $\mu$ M isomethylbutylxanthine under the following treatment conditions (A) DMSO (vehicle); (B) Troglitazone (10  $\mu$ M); (C) MButP (50  $\mu$ M); (E) MBenP (50  $\mu$ M); (F) MEHP (50  $\mu$ M); (G) MINP (50  $\mu$ M); (H) MIDP (50  $\mu$ M); and (I) MnOP (50  $\mu$ M). The media was replaced with DMEM/4% FBS containing 1.0  $\mu$ g/ml insulin and troglitazone (10  $\mu$ M), or the indicated phthalate monoester every 48 h after initiation of differentiation. The cells were fixed 6 days after initiation of adipogenesis and stained with Oil Red O. Note, lipid accumulation, indicative of adipogenesis in cells treated with phthalate monoesters that had significant PPAR $\gamma$  activity in the trans-activation studies, and the lack of lipid accumulation in samples treated with phthalate monoesters lacking significant PPAR $\gamma$  activity in the trans-activation studies.



more variability, due to differences in transfection efficiency and the requirement for other co-factors that could influence reporter activity. Based on results obtained with this model system, the hierarchy of potency for the activation of PPAR $\alpha$  among the different phthalate monoesters was determined to be MnOP > (MIDP  $\approx$  MINP  $\approx$  MIHP) > (MEHP  $\approx$  MIHP2) > MBenP > MEHA > (MButP  $\approx$  MEP). These findings are relatively consistent with data from others examining the ability of MEHP, MBenP, MButP monomethyl, and mono-n-butyl to trans-activate mouse PPAR $\alpha$  (Hurst and Waxman, 2003). The activation potency for PPAR $\alpha$  increased with increasing side-chain length of the phthalate monoesters, which is consistent with analysis for mouse PPAR $\alpha$  by others (Lampen *et al.*, 2003). A significant species difference between receptor activation was observed, with mouse PPAR $\alpha$  being activated by lower concentrations of phthalate monoesters and exhibiting greater luciferase activity as compared to human PPAR $\alpha$ , which is also consistent with previous reports (Hurst and Waxman, 2003; Maloney and Waxman, 1999).

There was a reasonably good association between the hierarchy of potency and species differences in PPAR $\alpha$  activity and the induction of ACOX and CYP4A mRNAs in the hepatoma cell lines. For example, MEP and MButP did not effectively trans-activate mouse PPAR $\alpha$ , and no changes in ACOX or CYP4A mRNA were detected in rat hepatoma FaO cells treated with these phthalate monoesters. In contrast, relatively good dose responses in mouse PPAR $\alpha$  trans-activation were found for MIHP, MEHP, MnOP, MINP, and MIDP between 10 and 100  $\mu$ M, and treatment of rat hepatoma FaO cells with these chemicals at these concentrations caused a dose-dependent induction of ACOX and CYP4A mRNAs. Others have shown that treating stably transfected rat hepatoma FaO cells expressing higher than endogenous levels of mouse PPAR $\alpha$  with 10–300  $\mu$ M MButP or MBenP causes dose-dependent increased expression of ACOX protein, but no significant differences in mRNA encoding ACOX (Hurst and Waxman, 2003). Therefore, the results from the present studies are similar to previous reports, as no differences in ACOX mRNA levels were detected in response to either MButP or MBenP in rat hepatoma FaO cells. The reason why Hurst and Waxman (2003) detected higher levels of ACOX protein is uncertain, but could be due to higher than endogenous levels of mouse PPAR $\alpha$  present in the cell line used for these studies. While marginally increased trans-activation of human PPAR $\alpha$  was observed at concentrations typically greater than 30  $\mu$ M for some of the phthalate monoesters including MIHP, MEHP, MnOP, MINP, and MIDP, no changes in the level of mRNA encoding ACOX or CYP4A were found in HepG2 cells cultured in the presence of these chemicals at 10 or 100  $\mu$ M. However, it is important to point out that, while statistically significant increases in reporter activity were observed for MIHP, MEHP, MnOP, MINP, and MIDP between 10 and 100  $\mu$ M using the human PPAR $\alpha$  construct, the fold increase was significantly smaller as compared to that observed using the mouse PPAR $\alpha$  construct. Therefore, the

lack of increases in PPAR $\alpha$  target gene mRNA in human HepG2 cells as compared to rodent FaO cells is still relatively consistent with the species differences observed between the human and mouse trans-activation assay. This is also consistent with other reports demonstrating the lack of induction of PPAR $\alpha$  target genes in HepG2 cells in response to peroxisome proliferators (Cornu-Chagnon *et al.*, 1995; Duclos *et al.*, 1997; Hsu *et al.*, 2001; Lawrence *et al.*, 2001; Savas *et al.*, 2003).

Previous studies have demonstrated significant differences in the response of humans and rodents to phthalates; rodents are generally sensitive, while humans and other primates are more refractory to the PPAR $\alpha$ -mediated pathological effects of phthalates (Doull *et al.*, 1999; Hall *et al.*, 1999; Kamendulis *et al.*, 2002; Klaunig *et al.*, 2003; Kurata *et al.*, 1998; Pugh *et al.*, 2000). Several investigators (Barber *et al.*, 1987; Smith *et al.*, 2000) have assessed the effects of a range of phthalates on rodent liver. The *in vivo* data are reasonably consistent with the *in vitro* PPAR $\alpha$  trans-activation data in at least a qualitative sense; low-molecular-weight phthalates (e.g., <C6 side-chains) have little effect on either liver weight or ACOX induction, whereas these effects are seen with the higher molecular weight species. Under *in vivo* conditions, the most active phthalates are DEHP, DINP, and DIDP. Interestingly, MnOP, which was the most active PPAR $\alpha$  agonist with the *in vitro* trans-activation assay of the present study, does not appear to influence PPAR $\alpha$ -dependent processes under *in vivo* conditions (Lake *et al.*, 1984; Mann *et al.*, 1985). This is possibly due to rapid conversion of DnOP under *in vivo* conditions to lower-molecular-weight metabolites (Albro and Moore, 1974). Results from the transactivation studies show that the mouse PPAR $\alpha$  ligand-binding domain is generally more sensitive than its human counterpart to phthalate monoesters. Examination of PPAR $\alpha$  target gene expression in a rodent and human liver cell line provides further evidence that rodents are more sensitive than humans to phthalate monoesters. The reason for this apparent species difference is uncertain, but there is evidence that differences in expression levels of liver PPAR $\alpha$ , mutations, or polymorphisms in target gene response elements, or mutant PPAR $\alpha$  isoforms may contribute to this effect (Klaunig *et al.*, 2003). However, mice that express human PPAR $\alpha$  in liver at similar levels to those reported in humans (in the absence of mouse PPAR $\alpha$  expression) do not exhibit increased hepatocellular proliferation in response to a potent PPAR $\alpha$  agonist (Cheung *et al.*, 2004). This suggests that there are likely fundamental structural differences in the PPAR $\alpha$  (e.g., ability to recruit co-activators) that mechanistically explain the species differences observed after exposure to PPAR $\alpha$  agonists such as phthalate monoesters.

Results from these studies have some relevance for human risk assessment, since humans are routinely exposed to phthalate monoesters, as shown by the presence of these compounds in human urine and serum (Barr *et al.*, 2003; Blount *et al.*, 2000; Kato *et al.*, 2004; Koch *et al.*, 2003; Silva *et al.*, 2004; Takatori *et al.*, 2004). Based on these studies, it is known that the urinary levels of the shorter side-chain phthalate monoesters are found at

the higher levels (e.g., as high as ~3800 ppb for MEP; 95th percentile) as compared to the longer side-chain phthalate monoesters (e.g., ~500 ppb for MEHP; 95th percentile). Additionally, the concentration of total MEHP detected in urine and serum may be relatively comparable, although serum levels may actually be lower, since the current technology for measuring serum phthalate monoesters is hampered by the presence of these compounds in many of the reagents used for this analysis in addition to the presence of esterases in serum (Takatori *et al.*, 2004). In a pharmacokinetic study in rats, oral doses of 30, 500, and 1000 mg DEHP/kg were associated with peak blood concentrations of MEHP of 10, 210, and 390  $\mu$ M, respectively (Kessler *et al.*, 2004), a concentration range similar to that used in the present studies. Rats administered DEHP orally in repeated administration studies exhibit significantly elevated liver weight and induction of ACOX at doses ranging from approximately 100 to 2000 mg/kg/day (Barber *et al.*, 1987). These observations, in addition to results obtained from the present studies, indicate that in rodents there is a qualitative relationship between effective concentrations under *in vitro* and *in vivo* conditions. Assuming the same relationship pertains to humans, blood concentrations similar to or higher than those that are effective in rodents, would be required to produce effective interactions with PPAR $\alpha$ . However, data from the human population at large indicate that, at least under ambient conditions, blood concentrations are well below this range. Serum concentrations of MEHP in the U.S. population range from 2.8 to 15.2 ng/ml with a geometric mean of 3.9 ng/ml (~14 nM) (Kato *et al.*, 2004). Thus, at least for DEHP, the average concentration in humans is approximately three orders of magnitude below minimally effective *in vitro* concentrations capable of activating PPAR $\alpha$ . Maximum serum levels of phthalate monoesters in humans within the general population are about two orders of magnitude below the effective concentrations required to activate PPAR $\alpha$ . For example, the maximum serum concentrations of MEP, MBP, and MEHP in a reference U.S. human population are 73.3 (0.4  $\mu$ M), 139.0 (0.6  $\mu$ M) and 34.8 ng/ml (0.1  $\mu$ M), respectively (Silva *et al.*, 2003). Further, internal exposure to DEHP/MEHP can be much higher in patients undergoing some specific procedures, and in some cases the blood concentrations could reach ~100  $\mu$ M. Combined, these observations suggest that activation of PPAR $\alpha$  is not likely to be a significant effect in response to phthalate monoester exposure in the general population, but is theoretically possible under certain conditions.

Results from the present studies also demonstrate that some phthalate monoesters can activate mouse PPAR $\beta$ , and that human PPAR $\beta$  appears to be less responsive to this effect. However, not all phthalate monoesters consistently activated PPAR $\beta$ . For example, no increase in PPAR $\beta$ -dependent reporter activity was detected in response to MEP, and the lack of a consistent dose-response curve for MIHP, MEHP, and MINP, within a known concentration range where solubility is not a confounding variable, suggests that these chemicals do not activate this PPAR isoform. In contrast, relatively good dose-response curves

for mouse PPAR $\beta$  activation were found for MButP, MBenP, MIHP2, MIDP, and MnOP, and this effect was essentially lacking when the human PPAR $\beta$  isoform was used for transactivation. Additionally, the efficacy of activation was greater for MIHP2, MIDP, and MnOP as compared to the MButP and MBenP, suggesting that the phthalate monoesters with longer side-chains function better as PPAR $\beta$  ligands, similar to that observed for PPAR $\alpha$  activation. Since isoC6, isoC10, and normal C8 side-chain monoesters effectively activated mouse PPAR $\beta$ , whereas isoC7, isoC8, and isoC9 side-chain monoesters were inactive, these data suggest that the structure-activity relationships are more subtle as compared to those observed for activation of PPAR $\alpha$ . While others have shown that human PPAR $\beta$  can be activated by MEHP using a co-transfected reporter and PPAR constructs, a direct comparison with a mouse PPAR $\beta$  construct under these conditions was not provided (Lampen *et al.*, 2003). The reason for the difference between these results and the present studies cannot be determined from this work. The relevance of phthalate monoester exposure and PPAR $\beta$  activation is unclear. While results from the present trans-activation studies suggest that human PPAR $\beta$  would not likely be activated, data from another group suggests that human PPAR $\beta$  can be activated by MEHP (Lampen *et al.*, 2003). Interestingly, activation of PPAR $\beta$  is associated with both positive and negative biological effects. For example, there are recent reports that intestinal cancer and breast and prostate cancer cell line growth can be enhanced by treating with a PPAR $\beta$  ligand (Gupta *et al.*, 2004; Stephen *et al.*, 2004); however the specificity of these effects has not been examined in a null mouse model. In contrast, recent reports have also shown that PPAR $\beta$  ligands can enhance serum levels of HDL cholesterol (Oliver *et al.*, 2001), promote epithelial cell differentiation (Schmuth *et al.*, 2004; Westergaard *et al.*, 2001), and in the absence of PPAR $\beta$  expression, skin and colon carcinogenesis is exacerbated (Harman *et al.*, 2004; Kim *et al.*, 2004). These results suggest that ligand activation of PPAR $\beta$  could function to prevent atherosclerosis and epithelial cancers. Therefore, until the specific biological function of PPAR $\beta$  is determined, the relevance of the present results is uncertain. However, based on observations made in the average human population described above, it is unlikely that human exposure would result in tissue concentrations capable of activating PPAR $\beta$ .

The hierarchy of potency observed in the trans-activation studies for the activation of PPAR $\gamma$  by the phthalate monoesters was determined to be MnOP > MINP > (MIDP  $\approx$  MIHP) > (MEHP  $\approx$  MBenP  $\approx$  MEHA) > (MIHP2) > (MButP  $\approx$  MEP), with both species exhibiting similar responsiveness; this hierarchy also correlated well with the ability of the various phthalate monoesters to induce PPAR $\gamma$ -dependent adipogenesis in 3T3-L1 fibroblast cell line. The hierarchy of potency and the similarity in species responsiveness for the activation of PPAR $\gamma$  observed in this study is consistent with previous reports (Hurst and Waxman, 2003; Maloney and Waxman, 1999). Similar to

the biological role of PPAR $\beta$ , the function of PPAR $\gamma$  is unclear, as there are conflicting reports in the literature. PPAR $\gamma$  agonists have been used for years as drugs to reduce blood glucose in type II diabetics, although the use of some agonists was associated with human mortality (Isley, 2003). Additionally, several studies have suggested that activation of PPAR $\gamma$  potentiates carcinogenic effects, as ligand treatment resulted in exacerbated carcinogenesis in APC<sup>min</sup> mice (Lefebvre *et al.*, 1998; Saez *et al.*, 1998), and overexpression of an oncogene and a ligand-independent form of PPAR $\gamma$  leads to exacerbated mammary tumorigenesis in bi-transgenic mice (Saez *et al.*, 2004). In contrast, other reports have shown that PPAR $\gamma$  ligands can significantly reduce the number of aberrant crypt foci and colon polyps induced by azoxymethane in rats, inhibit growth of transplanted tumors in nude mice, and inhibit growth of colon tumor cell lines (reviewed in Michalik *et al.*, 2004). Additionally, tumor multiplicity is significantly greater in azoxymethane-treated heterozygous PPAR $\gamma$ -null mice, and loss of function mutations are reported in human cases of colorectal cancer (reviewed in (Michalik *et al.*, 2004)). Therefore, while the present studies suggest that phthalate monoesters can activate both mouse and human PPAR $\gamma$ , further research is needed to determine the biological relevance of PPAR $\gamma$  activation that might occur in response to exposure to phthalate monoesters.

Lastly, while many ligands for PPARs (such as phthalate monoesters) function by activating specific PPARs, it is becoming increasingly clear that many ligands for nuclear receptors can be promiscuous and activate other nuclear receptors. Thus, while results from these studies demonstrate that phthalate monoesters can activate PPARs and that species differences exist in the ability to activate specific PPAR, it is still possible that these chemicals lead to events that are mediated by other nuclear receptors, and/or through events that are not dependent on receptor activation, per se, and this remains to be examined.

## ACKNOWLEDGMENTS

We gratefully acknowledge Dr. Gary Perdew for providing the human hepatoma HepG2 cells, Dr. Kevin Gaido and Ms. Susan Ross for providing the MButP, and the Phthalate Esters Panel of the American Chemistry Council for providing all other phthalate monoesters. This research was supported in part by the Phthalate Esters Panel, American Chemistry Council, the Huck Institutes for Life Sciences, The Pennsylvania State University, and the National Institutes of Health, CA89607, CA97999 (J.M.P.). The authors acknowledge that some authors are affiliated with the plastics industry.

## REFERENCES

Adibi, J. J., Perera, F. P., Jedrychowski, W., Camann, D. E., Barr, D., Jacek, R., and Whyatt, R. M. (2003). Prenatal exposures to phthalates among women in New York City and Krakow, Poland. *Environ. Health Perspect.* **111**, 1719–1722.

- Albro, P. W., and Moore, B. (1974). Identification of the metabolites of simple phthalate diesters in rat urine. *J. Chromatogr.* **94**, 209–218.
- Barber, E. D., Astill, B. D., Moran, E. J., Schneider, B. F., Gray, T. J., Lake, B. G., and Evans, J. G. (1987). Peroxisome induction studies on seven phthalate esters. *Toxicol. Ind. Health* **3**, 7–24.
- Barr, D. B., Silva, M. J., Kato, K., Reidy, J. A., Malek, N. A., Hurtz, D., Sadowski, M., Needham, L. L., and Calafat, A. M. (2003). Assessing human exposure to phthalates using monoesters and their oxidized metabolites as biomarkers. *Environ. Health Perspect.* **111**, 1148–1151.
- Berger, J., and Moller, D. E. (2002). The mechanisms of action of PPARs. *Annu. Rev. Med.* **53**, 409–435.
- Blass, C. R. (1992). PVC as a biomedical polymer—plasticizer and stabilizer toxicity. *Med. Device Technol.* **3**, 32–40.
- Blount, B. C., Silva, M. J., Caudill, S. P., Needham, L. L., Pirkle, J. L., Sampson, E. J., Lucier, G. W., Jackson, R. J., and Brock, J. W. (2000). Levels of seven urinary phthalate metabolites in a human reference population. *Environ. Health Perspect.* **108**, 979–982.
- Brun, R. P., Tontonoz, P., Forman, B. M., Ellis, R., Chen, J., Evans, R. M., and Spiegelman, B. M. (1996). Differential activation of adipogenesis by multiple PPAR isoforms. *Genes Dev.* **10**, 974–984.
- Cheung, C., Akiyama, T. E., Ward, J. M., Nicol, C. J., Feigenbaum, L., Vinson, C., and Gonzalez, F. J. (2004). Diminished hepatocellular proliferation in mice humanized for the nuclear receptor peroxisome proliferator-activated receptor- $\alpha$ . *Cancer Res.* **64**, 3849–3854.
- Cornu-Chagnon, M. C., Dupont, H., and Edgar, A. (1995). Fenofibrate: Metabolism and species differences for peroxisome proliferation in cultured hepatocytes. *Fundam. Appl. Toxicol.* **26**, 63–74.
- Doull, J., Cattley, R., Elcombe, C., Lake, B. G., Swenberg, J., Wilkinson, C., Williams, G., and van Gemert, M. (1999). A cancer risk assessment of di(2-ethylhexyl)phthalate: Application of the new U.S. EPA Risk Assessment Guidelines. *Regul. Toxicol. Pharmacol.* **29**, 327–357.
- Duclos, S., Bride, J., Ramirez, L. C., and Bournot, P. (1997). Peroxisome proliferation and beta-oxidation in FaO and MH1C1 rat hepatoma cells, HepG2 human hepatoblastoma cells and cultured human hepatocytes: Effect of ciprofibrate. *Eur. J. Cell Biol.* **72**, 314–323.
- Elsisi, A. E., Carter, D. E., and Sipes, I. G. (1989). Dermal absorption of phthalate diesters in rats. *Fundam. Appl. Toxicol.* **12**, 70–7.
- Fredenrich, A., and Grimaldi, P. A. (2004). Roles of peroxisome proliferator-activated receptor delta in skeletal muscle function and adaptation. *Curr. Opin. Clin. Nutr. Metab. Care* **7**, 377–381.
- Green, H., and Meuth, M. (1974). An established pre-adipose cell line and its differentiation in culture. *Cell* **3**, 127–133.
- Gupta, R. A., Wang, D., Katkuri, S., Wang, H., Dey, S. K., and DuBois, R. N. (2004). Activation of nuclear hormone receptor peroxisome proliferator-activated receptor-delta accelerates intestinal adenoma growth. *Nat. Med.* **10**, 245–247.
- Hall, M., Matthews, A., Webley, L., and Harling, R. (1999). Effects of di-isobutyl phthalate (DINP) on peroxisomal markers in the marmoset-DINP is not a peroxisome proliferator. *J. Toxicol. Sci.* **24**, 237–244.
- Harman, F. S., Nicol, C. J., Marin, H. E., Ward, J. M., Gonzalez, F. J., and Peters, J. M. (2004). Peroxisome proliferator-activated receptor-delta attenuates colon carcinogenesis. *Nat. Med.* **10**, 481–483.
- Hsu, M. H., Savas, U., Griffin, K. J., and Johnson, E. F. (2001). Identification of peroxisome proliferator-responsive human genes by elevated expression of the peroxisome proliferator-activated receptor alpha in HepG2 cells. *J. Biol. Chem.* **276**, 27950–27958.
- Huber, W. W., Grasl-Kraupp, B., and Schulte-Hermann, R. (1996). Hepatocarcinogenic potential of di(2-ethylhexyl)phthalate in rodents and its implications on human risk. *Crit. Rev. Toxicol.* **26**, 365–381.
- Hurst, C. H., and Waxman, D. J. (2003). Activation of PPARalpha and PPARgamma by environmental phthalate monoesters. *Toxicol. Sci.* **74**, 297–308.



- Isley, W. L. (2003). Hepatotoxicity of thiazolidinediones. *Expert Opin. Drug Saf.* **2**, 581–586.
- Kamendulis, L. M., Isenberg, J. S., Smith, J. H., Pugh, G., Jr., Lington, A. W., and Klaunig, J. E. (2002). Comparative effects of phthalate monoesters on gap junctional intercellular communication and peroxisome proliferation in rodent and primate hepatocytes. *J. Toxicol. Environ. Health A* **65**, 569–588.
- Kato, K., Silva, M. J., Reidy, J. A., Hurtz, D., III, Malek, N. A., Needham, L. L., Nakazawa, H., Barr, D. B., and Calafat, A. M. (2004). Mono(2-ethyl-5-hydroxyhexyl) phthalate and mono-(2-ethyl-5-oxohexyl) phthalate as biomarkers for human exposure assessment to di-(2-ethylhexyl) phthalate. *Environ. Health Perspect.* **112**, 327–330.
- Kavlock, R., Boekelheide, K., Chapin, R., Cunningham, M., Faustman, E., Foster, P., Golub, M., Henderson, R., Hinberg, I., Little, R., et al. (2002a). NTP Center for the Evaluation of Risks to Human Reproduction: Phthalates expert panel report on the reproductive and developmental toxicity of di(2-ethylhexyl) phthalate. *Reprod. Toxicol.* **16**, 529–653.
- Kavlock, R., Boekelheide, K., Chapin, R., Cunningham, M., Faustman, E., Foster, P., Golub, M., Henderson, R., Hinberg, I., Little, R., et al. (2002b). NTP Center for the Evaluation of Risks to Human Reproduction: Phthalates expert panel report on the reproductive and developmental toxicity of di-isononyl phthalate. *Reprod. Toxicol.* **16**, 679–708.
- Kavlock, R., Boekelheide, K., Chapin, R., Cunningham, M., Faustman, E., Foster, P., Golub, M., Henderson, R., Hinberg, I., Little, R., et al. (2002c). NTP Center for the Evaluation of Risks to Human Reproduction: Phthalates expert panel report on the reproductive and developmental toxicity of di-n-octyl phthalate. *Reprod. Toxicol.* **16**, 721–734.
- Kessler, W., Numtip, W., Grote, K., Csanady, G. A., Chahoud, I., and Filser, J. G. (2004). Blood burden of di(2-ethylhexyl) phthalate and its primary metabolite mono(2-ethylhexyl) phthalate in pregnant and nonpregnant rats and marmosets. *Toxicol. Appl. Pharmacol.* **195**, 142–53.
- Kim, D. J., Akiyama, T. E., Harman, F. S., Burns, A. M., Shan, W., Ward, J. M., Kennett, M. J., Gonzalez, F. J., and Peters, J. M. (2004). Peroxisome proliferator-activated receptor beta (delta) dependent regulation of ubiquitin C expression contributes to attenuation of skin carcinogenesis. *J. Biol. Chem.* **279**, 23719–23727.
- Klaunig, J. E., Babich, M. A., Baetcke, K. P., Cook, J. C., Corton, J. C., David, R. M., DeLuca, J. G., Lai, D. Y., McKee, R. H., Peters, J. M., et al. (2003). PPARalpha agonist-induced rodent tumors: Modes of action and human relevance. *Crit. Rev. Toxicol.* **33**, 655–780.
- Koch, H. M., Rossbach, B., Drexler, H., and Angerer, J. (2003). Internal exposure of the general population to DEHP and other phthalates—determination of secondary and primary phthalate monoester metabolites in urine. *Environ. Res.* **93**, 177–185.
- Kurata, Y., Kidachi, F., Yokoyama, M., Toyota, N., Tsuchitani, M., and Katoh, M. (1998). Subchronic toxicity of Di(2-ethylhexyl)phthalate in common marmosets: Lack of hepatic peroxisome proliferation, testicular atrophy, or pancreatic acinar cell hyperplasia. *Toxicol. Sci.* **42**, 49–56.
- Lake, B. G., Rijcken, W. R., Gray, T. J., Foster, J. R., and Gangolli, S. D. (1984). Comparative studies of the hepatic effects of di- and mono-n-octyl phthalates, di-(2-ethylhexyl) phthalate and clofibrate in the rat. *Acta Pharmacol. Toxicol. (Copenh.)* **54**, 167–176.
- Lampen, A., Zimnik, S., and Nau, H. (2003). Teratogenic phthalate esters and metabolites activate the nuclear receptors PPARs and induce differentiation of F9 cells. *Toxicol. Appl. Pharmacol.* **188**, 14–23.
- Lawrence, J. W., Li, Y., Chen, S., DeLuca, J. G., Berger, J. P., Umbenhauer, D. R., Moller, D. E., and Zhou, G. (2001). Differential gene regulation in human versus rodent hepatocytes by peroxisome proliferator-activated receptor (PPAR) alpha. PPARalpha fails to induce peroxisome proliferation-associated genes in human cells independently of the level of receptor expression. *J. Biol. Chem.* **276**, 31521–31527.
- Lefebvre, A. M., et al. (1998). Activation of the peroxisome proliferator-activated receptor gamma promotes the development of colon tumors in C57BL/6 J-APCMin/+ mice. *Nat. Med.* **4**, 1053–1057.
- Maloney, E. K., and Waxman, D. J. (1999). Trans-activation of PPARalpha and PPARgamma by structurally diverse environmental chemicals. *Toxicol. Appl. Pharmacol.* **161**, 209–218.
- Mann, A. H., Price, S. C., Mitchell, F. E., Grasso, P., Hinton, R. H., and Bridges, J. W. (1985). Comparison of the short-term effects of di(2-ethylhexyl) phthalate, di(n-hexyl) phthalate, and di(n-octyl) phthalate in rats. *Toxicol. Appl. Pharmacol.* **77**, 116–132.
- Michalik, L., Desvergne, B., and Wahli, W. (2004). Peroxisome-proliferator-activated receptors and cancers: Complex stories. *Nat. Rev. Cancer* **4**, 61–70.
- Oliver, W. R., Jr., Shenk, J. L., Snaith, M. R., Russell, C. S., Plunket, K. D., Bodkin, N. L., Lewis, M. C., Winegar, D. A., Sznajdman, M. L., Lambert, M. H., et al. (2001). A selective peroxisome proliferator-activated receptor delta agonist promotes reverse cholesterol transport. *Proc. Natl. Acad. Sci. U.S.A.* **98**, 5306–5311.
- Pugh, G., Jr., Isenberg, J. S., Kamendulis, L. M., Ackley, D. C., Clare, L. J., Brown, R., Lington, A. W., Smith, J. H., and Klaunig, J. E. (2000). Effects of di-isononyl phthalate, di-2-ethylhexyl phthalate, and clofibrate in cynomolgus monkeys. *Toxicol. Sci.* **56**, 181–188.
- Saez, E., Rosenfeld, J., Livolsi, A., Olson, P., Lombardo, E., Nelson, M., Banayo, E., Cardiff, R. D., Izpisua-Belmonte, J. C., and Evans, R. M. (2004). PPAR gamma signaling exacerbates mammary gland tumor development. *Genes Dev.* **18**, 528–540.
- Saez, E., Tontonoz, P., Nelson, M. C., Alvarez, J. G., Ming, U. T., Baird, S. M., Thomazy, V. A., and Evans, R. M. (1998). Activators of the nuclear receptor PPARgamma enhance colon polyp formation. *Nat. Med.* **4**, 1058–1061.
- Savas, U., Hsu, M. H., and Johnson, E. F. (2003). Differential regulation of human CYP4A genes by peroxisome proliferators and dexamethasone. *Arch. Biochem. Biophys.* **409**, 212–220.
- Schmuth, M., Haqq, C. M., Cairns, W. J., Holder, J. C., Dorsam, S., Chang, S., Lau, P., Fowler, A. J., Chuang, G., Moser, A. H., et al. (2004). Peroxisome proliferator-activated receptor (PPAR)-beta/delta stimulates differentiation and lipid accumulation in keratinocytes. *J. Invest. Dermatol.* **122**, 971–983.
- Shearer, B. G., and Hoekstra, W. J. (2003). Recent advances in peroxisome proliferator-activated receptor science. *Curr. Med. Chem.* **10**, 267–280.
- Silva, M. J., Barr, D. B., Reidy, J. A., Kato, K., Malek, N. A., Hodge, C. C., Hurtz, D., III, Calafat, A. M., Needham, L. L., and Brock, J. W. (2003). Glucuronidation patterns of common urinary and serum monoester phthalate metabolites. *Arch. Toxicol.* **77**, 561–567.
- Silva, M. J., Barr, D. B., Reidy, J. A., Malek, N. A., Hodge, C. C., Caudill, S. P., Brock, J. W., Needham, L. L., and Calafat, A. M. (2004). Urinary levels of seven phthalate metabolites in the U.S. population from the National Health and Nutrition Examination Survey (NHANES) 1999–2000. *Environ. Health Perspect.* **112**, 331–338.
- Smith, J. H., Isenberg, J. S., Pugh, G., Jr., Kamendulis, L. M., Ackley, D., Lington, A. W., and Klaunig, J. E. (2000). Comparative *in vivo* hepatic effects of Di-isononyl phthalate (DINP) and related C7–C11 dialkyl phthalates on gap junctional intercellular communication (GJIC), peroxisomal beta-oxidation (PBOX), and DNA synthesis in rat and mouse liver. *Toxicol. Sci.* **54**, 312–321.
- Stephen, R. L., Gustafsson, M. C., Jarvis, M., Tatoud, R., Marshall, B. R., Knight, D., Ehrenborg, E., Harris, A. L., Wolf, C. R., and Palmer, C. N. (2004). Activation of peroxisome proliferator-activated receptor delta stimulates the proliferation of human breast and prostate cancer cell lines. *Cancer Res.* **64**, 3162–3170.
- Takatori, S., Kitagawa, Y., Kitagawa, M., Nakazawa, H., and Hori, S. (2004). Determination of di(2-ethylhexyl)phthalate and mono(2-ethylhexyl)

- phthalate in human serum using liquid chromatography-tandem mass spectrometry. *J. Chromatogr. B Analyt. Technol. Biomed. Life Sci.* **804**, 397–401.
- Wang, Y. X., Lee, C. H., Tiep, S., Yu, R. T., Ham, J., Kang, H., and Evans, R. M. (2003). Peroxisome-proliferator-activated receptor delta activates fat metabolism to prevent obesity. *Cell* **113**, 159–170.
- Westergaard, M., Henningsen, J., Svendsen, M. L., Johansen, C., Jensen, U. B., Schroder, H. D., Kratchmarova, I., Berge, R. K., Iversen, L., Bolund, L., *et al.* (2001). Modulation of keratinocyte gene expression and differentiation by PPAR-selective ligands and tetradecylthioacetic acid. *J. Invest. Dermatol.* **116**, 702–712.
